# Supplementary material
Source: publisher figshare collection journal article supplement (https://acs.figshare.com/ndownloader/files/5688621)
Supplement: Supplementary file 1 [file 5688621]

# ic000825+.cif

data_shav22

_audit_creation_method            'SHELXL96 (Sheldrick, 1996)'
_chemical_name_systematic
;
 ?
;
_chemical_name_common             ?
_chemical_formula_moiety          'C33 H29 P Pt S4'
_chemical_formula_structural      ?
_chemical_formula_analytical      ?
_chemical_formula_sum             'C33 H29 P Pt S4'
_chemical_formula_weight          779.86
_chemical_melting_point           ?
_chemical_compound_source         'synthesized by the authors, see text'

_publ_section_exptl_prep
;

;


loop_
 _atom_type_symbol
 _atom_type_description
 _atom_type_scat_dispersion_real
 _atom_type_scat_dispersion_imag
 _atom_type_scat_source
 'C'  'C'   0.0181   0.0091
 'International Tables Vol C Tables 4.2.6.8 and 6.1.1.4'
 'H'  'H'   0.0000   0.0000
 'International Tables Vol C Tables 4.2.6.8 and 6.1.1.4'
 'S'  'S'   0.3331   0.5567
 'International Tables Vol C Tables 4.2.6.8 and 6.1.1.4'
 'P'  'P'   0.2955   0.4335
 'International Tables Vol C Tables 4.2.6.8 and 6.1.1.4'
 'Pt'  'Pt'  -4.5932   6.9264
 'International Tables Vol C Tables 4.2.6.8 and 6.1.1.4'

_symmetry_cell_setting             triclinic
_symmetry_space_group_name_H-M     'P-1'

loop_
 _symmetry_equiv_pos_as_xyz
 'x, y, z'
 '-x, -y, -z'

_cell_length_a                    10.2050(10)
_cell_length_b                    11.206(2)
_cell_length_c                    15.235(2)
_cell_angle_alpha                 93.14(2)
_cell_angle_beta                  92.54(2)
_cell_angle_gamma                 114.140(10)
_cell_volume                      1583.2(4)
_cell_formula_units_Z             2
_cell_measurement_temperature     293(2)
_cell_measurement_reflns_used     25
_cell_measurement_theta_min       27.5
_cell_measurement_theta_max       30.0

_exptl_crystal_description        'thick plate'
_exptl_crystal_colour             red
_exptl_crystal_size_max           0.48
_exptl_crystal_size_mid           0.35
_exptl_crystal_size_min           0.17
_exptl_crystal_density_meas       'not measured'
_exptl_crystal_density_diffrn     1.636
_exptl_crystal_density_method     none
_exptl_crystal_F_000              768
_exptl_absorpt_coefficient_mu     11.388
_exptl_absorpt_correction_type    'psi scan'
_exptl_absorpt_process_details    ?
_exptl_absorpt_correction_T_min   0.022965
_exptl_absorpt_correction_T_max   0.137165

_exptl_special_details
;
 ?
;

_diffrn_ambient_temperature       293(2)
_diffrn_radiation_wavelength      1.54056
_diffrn_radiation_type            CuK\a
_diffrn_radiation_source          'sealed tube'
_diffrn_radiation_monochromator   graphite
_diffrn_measurement_device_type   'Rigaku AFC6S'
_diffrn_measurement_method        omega/2theta scans'
_diffrn_standards_number          3
_diffrn_standards_interval_count  200
_diffrn_standards_interval_time   ?
_diffrn_standards_decay_%         0.80
_diffrn_reflns_number             9408
_diffrn_reflns_av_R_equivalents   0.053
_diffrn_reflns_av_sigmaI/netI     0.0127
_diffrn_reflns_limit_h_min        -11
_diffrn_reflns_limit_h_max        11
_diffrn_reflns_limit_k_min        -12
_diffrn_reflns_limit_k_max        12
_diffrn_reflns_limit_l_min        -17
_diffrn_reflns_limit_l_max       17
_diffrn_reflns_theta_min          2.91
_diffrn_reflns_theta_max          60.20
_reflns_number_total              4731
_reflns_number_gt                 4527
_reflns_threshold_expression      >2\s(I)

_computing_data_collection        ?
_computing_cell_refinement        ?
_computing_data_reduction         ?
_computing_structure_solution     'SHELXS96 (Sheldrick, 1990)'
_computing_structure_refinement
 ?
_computing_molecular_graphics
 'ORTEPII (Johnson (1976) in NRCVAX (Gabe et al (1989))'
_computing_publication_material
 'NRCVAX (Gabe et al (1989) and SHELXL96 (Sheldrick (1996))'

_refine_special_details
;
 Refinement of F^2^ against ALL reflections.  Weighted R-factors wR and all
 goodnesses of fit S are based on F^2^, conventional R-factors R
 are based on F, with F set to zero for negative F^2^. The observed criterion
 of F^2^ > 2sigma(F^2^) is used only for calculating  R-factor_obs etc. and is
 not relevant to the choice of reflections for refinement.  R-factors based
 on F^2^ are statistically about twice as large as those based on F, and R-
 factors based on ALL data will be even larger.
;

_refine_ls_structure_factor_coef  Fsqd
_refine_ls_matrix_type            full
_refine_ls_weighting_scheme       calc
_refine_ls_weighting_details
 'w=1/[\s^2^(Fo^2^)+(0.0683P)^2^+5.1067P] where P=(Fo^2^+2Fc^2^)/3'
_atom_sites_solution_primary      direct
_atom_sites_solution_secondary    difmap
_atom_sites_solution_hydrogens    geom
_refine_ls_hydrogen_treatment     constr
_refine_ls_extinction_method      'SHELXL96 (Sheldrick, 1996)'
_refine_ls_extinction_coef        0.00197(14)
_refine_ls_extinction_expression
 'Fc^*^=kFc[1+0.001xFc^2^\l^3^/sin(2\q)]^-1/4^'
_refine_ls_number_reflns          4731
_refine_ls_number_parameters      355
_refine_ls_number_restraints      0
_refine_ls_R_factor_all           0.0411
_refine_ls_R_factor_gt            0.0390
_refine_ls_wR_factor_all          0.1101
_refine_ls_wR_factor_ref          0.1073
_refine_ls_goodness_of_fit_all    1.063
_refine_ls_goodness_of_fit_ref    1.061
_refine_ls_restrained_S_all       1.063
_refine_ls_restrained_S_obs       1.061
_refine_ls_shift/su_max           0.001
_refine_ls_shift/su_mean          0.000

_refine_diff_density_max          1.852
_refine_diff_density_min          -1.611
_refine_diff_density_rms          0.119


_publ_section_exptl_refinement
;
 Space group confirmed by PLATON program (Speck, 1995).  Data reduction
 performed using DATDR2 in NRXVAX (Gabe et al (1989).  The structure was
 solved by direct method using SHELXS96
 (Sheldrick, 1990) and difmap synthesis using SHELXL96 (Sheldrick, 1996).
 All non-hydrogen atoms are refined  anisotropically,
 hydrogen atoms are isotropic.  Hydrogen atoms are constrained to the parent
 site using a riding model; SHELXL96 defaults, C-H 0.93 to 0.98\%A.  The
 isotropic factors, Uiso, were adjusted to a value 50% higher
 than Ueq of  the parent site (methyl) and 20% higher (others).  A final
 verification of possible voids was performed using the VOID routine
 of the PLATON program (Speck, 1995). Verification of higher symmetry using
 MISSYM and NEWSYM in PLATON (Speck, 1995).
 There are 5 important residual peaks all located near the Pt atom.
;

loop_
 _atom_site_label
 _atom_site_type_symbol
 _atom_site_fract_x
 _atom_site_fract_y
 _atom_site_fract_z
 _atom_site_U_iso_or_equiv
 _atom_site_adp_type
 _atom_site_occupancy
 _atom_site_calc_flag
 _atom_site_refinement_flags
 _atom_site_disorder_group
Pt1 Pt 0.19208(3) 0.08140(2) 0.216595(17) 0.04652(16) Uani 1 d . .
S1 S 0.06998(18) -0.11524(16) 0.28654(12) 0.0542(4) Uani 1 d . .
S2 S 0.3531(2) -0.01606(18) 0.23175(14) 0.0591(4) Uani 1 d . .
S3 S 0.2516(2) -0.2753(2) 0.30130(19) 0.0831(7) Uani 1 d . .
S4 S 0.0026(2) 0.1412(2) 0.20607(15) 0.0695(5) Uani 1 d . .
P1 P 0.32979(18) 0.25640(16) 0.14721(12) 0.0479(4) Uani 1 d . .
C1 C 0.2207(8) -0.1402(7) 0.2748(5) 0.0569(17) Uani 1 d . .
C11 C 0.0846(9) -0.3891(7) 0.3330(6) 0.066(2) Uani 1 d . .
C12 C 0.0239(10) -0.3620(8) 0.4068(6) 0.073(2) Uani 1 d . .
H12 H 0.0689 -0.2815 0.4396 0.088 Uiso 1 calc R .
C13 C -0.1053(11) -0.4561(8) 0.4315(6) 0.076(2) Uani 1 d . .
H13 H -0.1474 -0.4376 0.4803 0.091 Uiso 1 calc R .
C14 C -0.1709(10) -0.5764(8) 0.3842(6) 0.072(2) Uani 1 d . .
C15 C -0.1071(10) -0.6020(8) 0.3131(7) 0.075(2) Uani 1 d . .
H15 H -0.1502 -0.6839 0.2820 0.090 Uiso 1 calc R .
C16 C 0.0204(10) -0.5092(8) 0.2857(6) 0.074(2) Uani 1 d . .
H16 H 0.0613 -0.5280 0.2364 0.089 Uiso 1 calc R .
C17 C -0.3110(11) -0.6785(10) 0.4110(8) 0.097(3) Uani 1 d . .
H17A H -0.3096 -0.6759 0.4741 0.146 Uiso 1 calc R .
H17B H -0.3227 -0.7639 0.3877 0.146 Uiso 1 calc R .
H17C H -0.3896 -0.6604 0.3882 0.146 Uiso 1 calc R .
C21 C -0.0998(8) 0.0753(7) 0.2963(5) 0.0567(17) Uani 1 d . .
C22 C -0.2469(8) 0.0016(8) 0.2809(6) 0.070(2) Uani 1 d . .
H22 H -0.2889 -0.0154 0.2235 0.084 Uiso 1 calc R .
C23 C -0.3315(9) -0.0469(9) 0.3502(6) 0.074(2) Uani 1 d . .
H23 H -0.4301 -0.0947 0.3384 0.089 Uiso 1 calc R .
C24 C -0.2739(9) -0.0264(8) 0.4371(5) 0.066(2) Uani 1 d . .
C25 C -0.1273(9) 0.0472(8) 0.4506(5) 0.0644(19) Uani 1 d . .
H25 H -0.0840 0.0632 0.5076 0.077 Uiso 1 calc R .
C26 C -0.0435(8) 0.0976(8) 0.3819(5) 0.0638(19) Uani 1 d . .
H26 H 0.0545 0.1484 0.3940 0.077 Uiso 1 calc R .
C27 C -0.3652(12) -0.0847(11) 0.5113(7) 0.096(3) Uani 1 d . .
H27A H -0.3178 -0.1239 0.5482 0.144 Uiso 1 calc R .
H27B H -0.4567 -0.1504 0.4877 0.144 Uiso 1 calc R .
H27C H -0.3797 -0.0170 0.5454 0.144 Uiso 1 calc R .
C31 C 0.4634(7) 0.2280(6) 0.0855(5) 0.0524(16) Uani 1 d . .
C32 C 0.5779(8) 0.2154(8) 0.1300(6) 0.0643(19) Uani 1 d . .
H32 H 0.5883 0.2274 0.1912 0.077 Uiso 1 calc R .
C33 C 0.6770(9) 0.1855(9) 0.0855(7) 0.077(3) Uani 1 d . .
H33 H 0.7535 0.1779 0.1164 0.093 Uiso 1 calc R .
C34 C 0.6616(10) 0.1670(9) -0.0055(7) 0.080(3) Uani 1 d . .
H34 H 0.7261 0.1443 -0.0360 0.096 Uiso 1 calc R .
C35 C 0.5509(11) 0.1820(10) -0.0507(7) 0.086(3) Uani 1 d . .
H35 H 0.5424 0.1723 -0.1120 0.103 Uiso 1 calc R .
C36 C 0.4525(9) 0.2115(8) -0.0061(6) 0.069(2) Uani 1 d . .
H36 H 0.3774 0.2206 -0.0377 0.083 Uiso 1 calc R .
C41 C 0.2288(7) 0.3049(7) 0.0668(5) 0.0521(16) Uani 1 d . .
C42 C 0.2524(9) 0.4345(7) 0.0583(6) 0.069(2) Uani 1 d . .
H42 H 0.3202 0.5014 0.0961 0.083 Uiso 1 calc R .
C43 C 0.1738(12) 0.4631(10) -0.0070(7) 0.092(3) Uani 1 d . .
H43 H 0.1899 0.5501 -0.0129 0.110 Uiso 1 calc R .
C44 C 0.0727(12) 0.3664(12) -0.0631(7) 0.096(3) Uani 1 d . .
H44 H 0.0206 0.3874 -0.1066 0.115 Uiso 1 calc R .
C45 C 0.0492(10) 0.2380(10) -0.0544(6) 0.081(3) Uani 1 d . .
H45 H -0.0187 0.1716 -0.0924 0.097 Uiso 1 calc R .
C46 C 0.1264(8) 0.2074(8) 0.0106(5) 0.0613(18) Uani 1 d . .
H46 H 0.1091 0.1202 0.0166 0.074 Uiso 1 calc R .
C51 C 0.4325(8) 0.4009(6) 0.2218(5) 0.0562(17) Uani 1 d . .
C52 C 0.3814(11) 0.4154(8) 0.3010(6) 0.078(2) Uani 1 d . .
H52 H 0.2932 0.3533 0.3155 0.093 Uiso 1 calc R .
C53 C 0.4601(15) 0.5221(11) 0.3598(8) 0.103(4) Uani 1 d . .
H53 H 0.4244 0.5309 0.4137 0.123 Uiso 1 calc R .
C54 C 0.5878(16) 0.6137(11) 0.3401(10) 0.113(4) Uani 1 d . .
H54 H 0.6412 0.6841 0.3806 0.135 Uiso 1 calc R .
C55 C 0.6374(12) 0.6017(10) 0.2607(10) 0.108(4) Uani 1 d . .
H55 H 0.7240 0.6662 0.2463 0.130 Uiso 1 calc R .
C56 C 0.5613(10) 0.4946(8) 0.1999(7) 0.081(2) Uani 1 d . .
H56 H 0.5970 0.4869 0.1457 0.097 Uiso 1 calc R .

loop_
 _atom_site_aniso_label
 _atom_site_aniso_U_11
 _atom_site_aniso_U_22
 _atom_site_aniso_U_33
 _atom_site_aniso_U_23
 _atom_site_aniso_U_13
 _atom_site_aniso_U_12
Pt1 0.0493(2) 0.0358(2) 0.0552(2) 0.01175(12) 0.00572(12) 0.01717(14)
S1 0.0535(9) 0.0436(9) 0.0656(10) 0.0200(8) 0.0096(8) 0.0179(7)
S2 0.0578(10) 0.0467(9) 0.0790(12) 0.0210(8) 0.0177(9) 0.0245(8)
S3 0.0683(12) 0.0507(11) 0.140(2) 0.0377(12) 0.0171(13) 0.0300(10)
S4 0.0630(11) 0.0749(13) 0.0862(13) 0.0401(11) 0.0203(10) 0.0387(10)
P1 0.0499(9) 0.0348(8) 0.0568(9) 0.0108(7) 0.0042(7) 0.0142(7)
C1 0.062(4) 0.039(4) 0.068(4) 0.011(3) 0.007(3) 0.018(3)
C11 0.073(5) 0.040(4) 0.092(6) 0.025(4) 0.006(4) 0.028(4)
C12 0.094(6) 0.039(4) 0.082(6) 0.015(4) -0.002(5) 0.021(4)
C13 0.100(6) 0.057(5) 0.075(5) 0.015(4) 0.014(5) 0.034(5)
C14 0.076(5) 0.055(5) 0.086(6) 0.024(4) 0.004(4) 0.027(4)
C15 0.079(5) 0.043(4) 0.101(7) 0.009(4) 0.002(5) 0.023(4)
C16 0.081(6) 0.052(5) 0.096(6) 0.012(4) 0.010(5) 0.034(4)
C17 0.079(6) 0.071(6) 0.133(9) 0.035(6) 0.013(6) 0.018(5)
C21 0.058(4) 0.048(4) 0.071(5) 0.016(3) 0.009(3) 0.026(3)
C22 0.060(5) 0.066(5) 0.074(5) 0.022(4) -0.005(4) 0.016(4)
C23 0.052(4) 0.072(5) 0.090(6) 0.027(5) 0.009(4) 0.013(4)
C24 0.074(5) 0.064(5) 0.066(5) 0.015(4) 0.017(4) 0.033(4)
C25 0.067(5) 0.062(5) 0.065(5) -0.002(4) 0.002(4) 0.029(4)
C26 0.049(4) 0.061(5) 0.078(5) 0.008(4) 0.006(4) 0.019(3)
C27 0.101(7) 0.097(7) 0.088(7) 0.025(6) 0.033(6) 0.034(6)
C31 0.054(4) 0.035(3) 0.067(4) 0.010(3) 0.006(3) 0.016(3)
C32 0.056(4) 0.060(5) 0.078(5) 0.024(4) 0.010(4) 0.023(4)
C33 0.056(5) 0.061(5) 0.119(8) 0.034(5) 0.016(5) 0.024(4)
C34 0.063(5) 0.069(5) 0.107(8) 0.006(5) 0.024(5) 0.025(4)
C35 0.081(6) 0.095(7) 0.078(6) -0.006(5) 0.012(5) 0.033(5)
C36 0.062(5) 0.065(5) 0.078(5) -0.002(4) 0.006(4) 0.025(4)
C41 0.049(4) 0.047(4) 0.061(4) 0.018(3) 0.005(3) 0.018(3)
C42 0.074(5) 0.044(4) 0.088(6) 0.019(4) 0.004(4) 0.021(4)
C43 0.105(7) 0.070(6) 0.110(8) 0.041(6) 0.002(6) 0.043(6)
C44 0.093(7) 0.111(9) 0.092(7) 0.039(6) -0.008(6) 0.049(7)
C45 0.075(5) 0.091(7) 0.066(5) 0.012(5) -0.011(4) 0.026(5)
C46 0.062(4) 0.054(4) 0.062(4) 0.011(3) -0.001(3) 0.017(4)
C51 0.062(4) 0.036(3) 0.068(4) 0.002(3) -0.006(3) 0.018(3)
C52 0.092(6) 0.054(5) 0.088(6) -0.006(4) -0.001(5) 0.034(4)
C53 0.137(10) 0.078(7) 0.087(7) -0.025(6) -0.003(7) 0.044(7)
C54 0.136(11) 0.067(7) 0.132(11) -0.038(7) -0.048(9) 0.049(8)
C55 0.080(7) 0.057(6) 0.161(12) -0.018(7) -0.027(7) 0.009(5)
C56 0.071(5) 0.052(5) 0.104(7) -0.005(5) -0.004(5) 0.012(4)

_geom_special_details
;
 All esds (except the esd in the dihedral angle between two l.s. planes)
 are estimated using the full covariance matrix.  The cell esds are taken
 into account individually in the estimation of esds in distances, angles
 and torsion angles; correlations between esds in cell parameters are only
 used when they are defined by crystal symmetry.  An approximate (isotropic)
 treatment of cell esds is used for estimating esds involving l.s. planes.
;

loop_
 _geom_bond_atom_site_label_1
 _geom_bond_atom_site_label_2
 _geom_bond_distance
 _geom_bond_site_symmetry_2
 _geom_bond_publ_flag
Pt1 P1 2.2456(17) . y
Pt1 S4 2.2930(19) . y
Pt1 S2 2.3257(18) . y
Pt1 S1 2.3818(17) . y
S1 C1 1.688(8) . y
S2 C1 1.683(7) . y
S3 C1 1.732(7) . y
S3 C11 1.768(8) . y
S4 C21 1.771(7) . y
P1 C41 1.811(7) . y
P1 C31 1.811(7) . y
P1 C51 1.821(7) . y
C11 C16 1.375(12) . y
C11 C12 1.385(13) . y
C12 C13 1.393(13) . y
C12 H12 0.9300 . ?
C13 C14 1.378(13) . y
C13 H13 0.9300 . ?
C14 C15 1.364(13) . y
C14 C17 1.512(12) . y
C15 C16 1.392(12) . y
C15 H15 0.9300 . ?
C16 H16 0.9300 . ?
C17 H17A 0.9600 . ?
C17 H17B 0.9600 . ?
C17 H17C 0.9600 . ?
C21 C26 1.368(11) . y
C21 C22 1.387(11) . y
C22 C23 1.385(12) . y
C22 H22 0.9300 . ?
C23 C24 1.391(12) . y
C23 H23 0.9300 . ?
C24 C25 1.380(12) . y
C24 C27 1.500(12) . y
C25 C26 1.376(11) . y
C25 H25 0.9300 . ?
C26 H26 0.9300 . ?
C27 H27A 0.9600 . ?
C27 H27B 0.9600 . ?
C27 H27C 0.9600 . ?
C31 C32 1.386(10) . y
C31 C36 1.392(11) . y
C32 C33 1.381(12) . y
C32 H32 0.9300 . ?
C33 C34 1.383(14) . y
C33 H33 0.9300 . ?
C34 C35 1.371(14) . y
C34 H34 0.9300 . ?
C35 C36 1.373(12) . y
C35 H35 0.9300 . ?
C36 H36 0.9300 . ?
C41 C46 1.380(10) . y
C41 C42 1.387(10) . y
C42 C43 1.381(12) . y
C42 H42 0.9300 . ?
C43 C44 1.370(15) . y
C43 H43 0.9300 . ?
C44 C45 1.373(15) . y
C44 H44 0.9300 . ?
C45 C46 1.381(11) . y
C45 H45 0.9300 . ?
C46 H46 0.9300 . ?
C51 C52 1.362(12) . y
C51 C56 1.375(12) . y
C52 C53 1.382(14) . y
C52 H52 0.9300 . ?
C53 C54 1.347(18) . y
C53 H53 0.9300 . ?
C54 C55 1.352(19) . y
C54 H54 0.9300 . ?
C55 C56 1.399(14) . y
C55 H55 0.9300 . ?
C56 H56 0.9300 . ?

loop_
 _geom_angle_atom_site_label_1
 _geom_angle_atom_site_label_2
 _geom_angle_atom_site_label_3
 _geom_angle
 _geom_angle_site_symmetry_1
 _geom_angle_site_symmetry_3
 _geom_angle_publ_flag
P1 Pt1 S4 91.03(7) . . y
P1 Pt1 S2 98.72(6) . . y
S4 Pt1 S2 169.73(7) . . y
P1 Pt1 S1 172.26(6) . . y
S4 Pt1 S1 96.48(7) . . y
S2 Pt1 S1 73.68(6) . . y
C1 S1 Pt1 85.2(2) . . y
C1 S2 Pt1 87.1(3) . . y
C1 S3 C11 104.9(4) . . y
C21 S4 Pt1 105.2(2) . . y
C41 P1 C31 104.6(3) . . y
C41 P1 C51 106.9(3) . . y
C31 P1 C51 104.8(3) . . y
C41 P1 Pt1 113.5(2) . . y
C31 P1 Pt1 112.9(2) . . y
C51 P1 Pt1 113.4(3) . . y
S2 C1 S1 113.8(4) . . y
S2 C1 S3 118.4(4) . . y
S1 C1 S3 127.8(4) . . y
C16 C11 C12 120.5(8) . . y
C16 C11 S3 118.2(7) . . y
C12 C11 S3 121.2(6) . . y
C11 C12 C13 119.5(8) . . y
C11 C12 H12 120.2 . . ?
C13 C12 H12 120.2 . . ?
C14 C13 C12 120.4(9) . . y
C14 C13 H13 119.8 . . ?
C12 C13 H13 119.8 . . ?
C15 C14 C13 118.9(8) . . y
C15 C14 C17 120.6(9) . . y
C13 C14 C17 120.4(9) . . y
C14 C15 C16 122.0(8) . . y
C14 C15 H15 119.0 . . ?
C16 C15 H15 119.0 . . ?
C11 C16 C15 118.6(9) . . y
C11 C16 H16 120.7 . . ?
C15 C16 H16 120.7 . . ?
C14 C17 H17A 109.5 . . ?
C14 C17 H17B 109.5 . . ?
H17A C17 H17B 109.5 . . ?
C14 C17 H17C 109.5 . . ?
H17A C17 H17C 109.5 . . ?
H17B C17 H17C 109.5 . . ?
C26 C21 C22 117.4(7) . . y
C26 C21 S4 123.8(6) . . y
C22 C21 S4 118.8(6) . . y
C23 C22 C21 120.4(8) . . y
C23 C22 H22 119.8 . . ?
C21 C22 H22 119.8 . . ?
C22 C23 C24 122.2(8) . . y
C22 C23 H23 118.9 . . ?
C24 C23 H23 118.9 . . ?
C25 C24 C23 116.2(7) . . y
C25 C24 C27 122.0(8) . . y
C23 C24 C27 121.8(8) . . y
C26 C25 C24 121.7(8) . . y
C26 C25 H25 119.2 . . ?
C24 C25 H25 119.2 . . ?
C21 C26 C25 122.1(7) . . y
C21 C26 H26 119.0 . . ?
C25 C26 H26 119.0 . . ?
C24 C27 H27A 109.5 . . ?
C24 C27 H27B 109.5 . . ?
H27A C27 H27B 109.5 . . ?
C24 C27 H27C 109.5 . . ?
H27A C27 H27C 109.5 . . ?
H27B C27 H27C 109.5 . . ?
C32 C31 C36 117.7(7) . . y
C32 C31 P1 119.7(6) . . y
C36 C31 P1 122.5(6) . . y
C33 C32 C31 121.5(8) . . y
C33 C32 H32 119.3 . . ?
C31 C32 H32 119.3 . . ?
C32 C33 C34 119.4(8) . . y
C32 C33 H33 120.3 . . ?
C34 C33 H33 120.3 . . ?
C35 C34 C33 119.9(9) . . y
C35 C34 H34 120.1 . . ?
C33 C34 H34 120.1 . . ?
C34 C35 C36 120.4(9) . . y
C34 C35 H35 119.8 . . ?
C36 C35 H35 119.8 . . ?
C35 C36 C31 121.0(9) . . y
C35 C36 H36 119.5 . . ?
C31 C36 H36 119.5 . . ?
C46 C41 C42 119.3(7) . . y
C46 C41 P1 117.7(5) . . y
C42 C41 P1 123.0(6) . . y
C43 C42 C41 119.2(8) . . y
C43 C42 H42 120.4 . . ?
C41 C42 H42 120.4 . . ?
C44 C43 C42 121.5(9) . . y
C44 C43 H43 119.2 . . ?
C42 C43 H43 119.2 . . ?
C43 C44 C45 119.2(9) . . y
C43 C44 H44 120.4 . . ?
C45 C44 H44 120.4 . . ?
C44 C45 C46 120.1(9) . . y
C44 C45 H45 119.9 . . ?
C46 C45 H45 119.9 . . ?
C41 C46 C45 120.7(8) . . y
C41 C46 H46 119.7 . . ?
C45 C46 H46 119.7 . . ?
C52 C51 C56 119.6(8) . . y
C52 C51 P1 119.4(6) . . y
C56 C51 P1 121.0(7) . . y
C51 C52 C53 120.2(10) . . y
C51 C52 H52 119.9 . . ?
C53 C52 H52 119.9 . . ?
C54 C53 C52 121.0(11) . . y
C54 C53 H53 119.5 . . ?
C52 C53 H53 119.5 . . ?
C53 C54 C55 119.1(10) . . y
C53 C54 H54 120.5 . . ?
C55 C54 H54 120.5 . . ?
C54 C55 C56 121.5(11) . . y
C54 C55 H55 119.2 . . ?
C56 C55 H55 119.2 . . ?
C51 C56 C55 118.5(10) . . y
C51 C56 H56 120.7 . . ?
C55 C56 H56 120.7 . . ?

loop_
 _geom_torsion_atom_site_label_1
 _geom_torsion_atom_site_label_2
 _geom_torsion_atom_site_label_3
 _geom_torsion_atom_site_label_4
 _geom_torsion
 _geom_torsion_site_symmetry_1
 _geom_torsion_site_symmetry_2
 _geom_torsion_site_symmetry_3
 _geom_torsion_site_symmetry_4
 _geom_torsion_publ_flag
 P1 Pt1 S1 C1 8.7(6) . . . . y
 S4 Pt1 S1 C1 174.3(3) . . . . y
 S2 Pt1 S1 C1 -2.7(3) . . . . y
 P1 Pt1 S2 C1 -175.8(3) . . . . y
 S4 Pt1 S2 C1 -14.3(5) . . . . y
 S1 Pt1 S2 C1 2.7(3) . . . . y
 P1 Pt1 S4 C21 -152.8(3) . . . . y
 S2 Pt1 S4 C21 45.5(5) . . . . y
 S1 Pt1 S4 C21 29.1(3) . . . . y
 S4 Pt1 P1 C41 -31.9(3) . . . . y
 S2 Pt1 P1 C41 144.8(3) . . . . y
 S1 Pt1 P1 C41 133.9(5) . . . . y
 S4 Pt1 P1 C31 -150.6(3) . . . . y
 S2 Pt1 P1 C31 26.1(3) . . . . y
 S1 Pt1 P1 C31 15.1(6) . . . . y
 S4 Pt1 P1 C51 90.3(3) . . . . y
 S2 Pt1 P1 C51 -92.9(3) . . . . y
 S1 Pt1 P1 C51 -103.9(5) . . . . y
 Pt1 S2 C1 S1 -3.9(4) . . . . y
 Pt1 S2 C1 S3 176.0(5) . . . . y
 Pt1 S1 C1 S2 3.8(4) . . . . y
 Pt1 S1 C1 S3 -176.1(6) . . . . y
 C11 S3 C1 S2 -174.1(5) . . . . y
 C11 S3 C1 S1 5.8(7) . . . . y
 C1 S3 C11 C16 119.8(7) . . . . y
 C1 S3 C11 C12 -64.2(7) . . . . y
 C16 C11 C12 C13 -1.7(12) . . . . y
 S3 C11 C12 C13 -177.6(6) . . . . y
 C11 C12 C13 C14 1.3(13) . . . . y
 C12 C13 C14 C15 0.3(13) . . . . y
 C12 C13 C14 C17 -179.9(8) . . . . y
 C13 C14 C15 C16 -1.5(13) . . . . y
 C17 C14 C15 C16 178.7(9) . . . . y
 C12 C11 C16 C15 0.5(12) . . . . y
 S3 C11 C16 C15 176.6(6) . . . . y
 C14 C15 C16 C11 1.1(13) . . . . y
 Pt1 S4 C21 C26 53.5(7) . . . . y
 Pt1 S4 C21 C22 -129.6(6) . . . . y
 C26 C21 C22 C23 -0.1(12) . . . . y
 S4 C21 C22 C23 -177.3(7) . . . . y
 C21 C22 C23 C24 -1.2(14) . . . . y
 C22 C23 C24 C25 1.1(13) . . . . y
 C22 C23 C24 C27 -177.0(9) . . . . y
 C23 C24 C25 C26 0.2(12) . . . . y
 C27 C24 C25 C26 178.3(9) . . . . y
 C22 C21 C26 C25 1.4(12) . . . . y
 S4 C21 C26 C25 178.4(6) . . . . y
 C24 C25 C26 C21 -1.5(13) . . . . y
 C41 P1 C31 C32 166.8(6) . . . . y
 C51 P1 C31 C32 54.5(6) . . . . y
 Pt1 P1 C31 C32 -69.4(6) . . . . y
 C41 P1 C31 C36 -16.5(7) . . . . y
 C51 P1 C31 C36 -128.8(6) . . . . y
 Pt1 P1 C31 C36 107.3(6) . . . . y
 C36 C31 C32 C33 -1.0(11) . . . . y
 P1 C31 C32 C33 175.9(6) . . . . y
 C31 C32 C33 C34 -0.3(12) . . . . y
 C32 C33 C34 C35 1.9(14) . . . . y
 C33 C34 C35 C36 -2.0(15) . . . . y
 C34 C35 C36 C31 0.6(15) . . . . y
 C32 C31 C36 C35 0.9(12) . . . . y
 P1 C31 C36 C35 -175.9(7) . . . . y
 C31 P1 C41 C46 78.5(6) . . . . y
 C51 P1 C41 C46 -170.7(6) . . . . y
 Pt1 P1 C41 C46 -44.9(6) . . . . y
 C31 P1 C41 C42 -100.1(7) . . . . y
 C51 P1 C41 C42 10.7(8) . . . . y
 Pt1 P1 C41 C42 136.5(6) . . . . y
 C46 C41 C42 C43 -0.8(13) . . . . y
 P1 C41 C42 C43 177.8(7) . . . . y
 C41 C42 C43 C44 0.4(16) . . . . y
 C42 C43 C44 C45 -0.2(18) . . . . y
 C43 C44 C45 C46 0.4(17) . . . . y
 C42 C41 C46 C45 1.0(12) . . . . y
 P1 C41 C46 C45 -177.6(7) . . . . y
 C44 C45 C46 C41 -0.8(14) . . . . y
 C41 P1 C51 C52 98.8(7) . . . . y
 C31 P1 C51 C52 -150.6(6) . . . . y
 Pt1 P1 C51 C52 -27.1(7) . . . . y
 C41 P1 C51 C56 -81.9(7) . . . . y
 C31 P1 C51 C56 28.7(7) . . . . y
 Pt1 P1 C51 C56 152.3(6) . . . . y
 C56 C51 C52 C53 -1.5(14) . . . . y
 P1 C51 C52 C53 177.8(8) . . . . y
 C51 C52 C53 C54 0.3(17) . . . . y
 C52 C53 C54 C55 1.5(19) . . . . y
 C53 C54 C55 C56 -2.0(19) . . . . y
 C52 C51 C56 C55 1.0(13) . . . . y
 P1 C51 C56 C55 -178.3(8) . . . . y
 C54 C55 C56 C51 0.8(17) . . . . y

#===END
